# Supplementary material for: Development of a porcine (Sus scofa) embryo-specific microarray: array annotation and validation
Source: PubMed Central journal article supplement (PMC3468353; doi:10.1186/1471-2164-13-370), 2012-08-03
Supplement: 1471-2164-13-370-S16.pdf [file 1471-2164-13-370-S16.pdf]

| Probe ID    | Gene_Symbol | Mean intensity in COC | Mean intensity Embryos | Expression condition |
|-------------|-------------|-----------------------|------------------------|----------------------|
| EMPV1_05268 | OR9Q2       | 6.839148              | 6.961849               | in both              |
| EMPV1_40418 | OR51S1      | 6.870413              | 6.976416               | in both              |
| EMPV1_37494 | OR52R1      | 6.819017              | 7.011617               | in both              |
| EMPV1_20907 | OR5D13      | 6.763874              | 7.065205               | in both              |
| EMPV1_09103 | OR5AR1      | 6.753858              | 7.073603               | in both              |
| EMPV1_35772 | OR6X1       | 6.776291              | 7.074715               | in both              |
| EMPV1_30175 | OR5B12      | 6.845796              | 7.106134               | in both              |
| EMPV1_31271 | OR6C6       | 7.171631              | 7.10807                | in both              |
| EMPV1_43600 | OR4C45      | 6.82034               | 7.121959               | in both              |
| EMPV1_25805 | OR4K5       | 6.788527              | 7.125371               | in both              |
| EMPV1_30390 | OR52E5      | 6.778026              | 7.132514               | in both              |
| EMPV1_17487 | OR1J2       | 6.759699              | 7.139805               | in both              |
| EMPV1_12623 | OR8B12      | 6.807487              | 7.145586               | in both              |
| EMPV1_08011 | OR10AG1     | 6.787332              | 7.147023               | in both              |
| EMPV1_04006 | OR6N2       | 6.703125              | 7.154738               | in both              |
| EMPV1_35138 | OR10G6      | 6.956086              | 7.169368               | in both              |
| EMPV1_07022 | OR51C1P     | 6.943733              | 7.179326               | in both              |
| EMPV1_04877 | OR51V1      | 7.100996              | 7.187248               | in both              |
| EMPV1_01066 | OR52N5      | 6.704545              | 7.188436               | in both              |
| EMPV1_06833 | OR5D16      | 6.834589              | 7.18908                | in both              |
| EMPV1_19320 | OR13A1      | 6.880293              | 7.192325               | in both              |
| EMPV1_35418 | OR2Y1       | 6.739343              | 7.220759               | in both              |
| EMPV1_03531 | OR2H1       | 6.854165              | 7.227471               | in both              |
| EMPV1_10635 | OR13H1      | 6.702459              | 7.262485               | in both              |
| EMPV1_28338 | OR2K2       | 6.733938              | 7.273568               | in both              |
| EMPV1_02456 | OR13C8      | 7.073036              | 7.281062               | in both              |
| EMPV1_05773 | OR5J2       | 6.82848               | 7.294357               | in both              |
| EMPV1_12407 | OR1N1       | 6.927236              | 7.296257               | in both              |
| EMPV1_00441 | OR10R2      | 6.915026              | 7.325862               | in both              |
| EMPV1_34694 | OR9G4       | 7.032089              | 7.341058               | in both              |
| EMPV1_10415 | OR4C5       | 6.80731               | 7.344398               | in both              |
| EMPV1_32879 | OR6K6       | 6.818036              | 7.364491               | in both              |
| EMPV1_21356 | OR10J1      | 7.034591              | 7.390859               | in both              |

|             |         |                            |                            |                 |
|-------------|---------|----------------------------|----------------------------|-----------------|
| EMPV1_09419 | OR8D1   | 6.788324                   | 7.394308                   | in both         |
| EMPV1_32363 | OR10Z1  | 6.995251                   | 7.403728                   | in both         |
| EMPV1_16786 | OR4E2   | 6.842628                   | 7.433012                   | in both         |
| EMPV1_04586 | OR8B8   | 7.028431                   | 7.464629                   | in both         |
| EMPV1_10384 | OR4S2   | 6.921332                   | 7.502022                   | in both         |
| EMPV1_43245 | OR14K1  | 7.112813                   | 7.516088                   | in both         |
| EMPV1_40463 | OR10A4  | 6.957746                   | 7.518001                   | in both         |
| EMPV1_06735 | OR8G5   | 7.281311                   | 7.53682                    | in both         |
| EMPV1_08355 | OR1J1   | 7.259571                   | 7.549838                   | in both         |
| EMPV1_18448 | OR10V1  | 7.498271                   | 7.552791                   | in both         |
| EMPV1_27294 | OR3A1   | 7.09436                    | 7.587522                   | in both         |
| EMPV1_33044 | OR14A16 | 7.072624                   | 7.599299                   | in both         |
| EMPV1_01145 | OR5B2   | 7.393008                   | 7.641653                   | in both         |
| EMPV1_24505 | OR2Z1   | 7.680132                   | 7.701306                   | in both         |
| EMPV1_24598 | OR2B11  | 7.319828                   | 7.718648                   | in both         |
| EMPV1_02221 | OR10P1  | 7.026767                   | 7.719477                   | in both         |
| EMPV1_16634 | OR52H1  | 7.69202                    | 7.764929                   | in both         |
| EMPV1_41690 | OR6K2   | 7.007557                   | 7.783503                   | in both         |
| EMPV1_28598 | OR7G3   | 7.493132                   | 7.832918                   | in both         |
| EMPV1_13751 | OR51A7  | 7.353949                   | 7.9057                     | in both         |
| EMPV1_11772 | OR56A1  | 7.326478                   | 8.048461                   | in both         |
| EMPV1_07007 | OR51D1  | 8.315179                   | 8.460223                   | in both         |
| EMPV1_24052 | OR51G1  | 8.237912                   | 8.827682                   | in both         |
| EMPV1_24702 | OR2G2   | 9.36049                    | 9.045728                   | in both         |
| EMPV1_18813 | OR5D18  | 8.661377                   | 9.135075                   | in both         |
| EMPV1_17759 | OR7A10  | 6.80791                    | 9.978891                   | in both         |
| EMPV1_23744 | OR6Q1   | 6.737675                   | siganl < background (6.96) | Only in COC     |
| EMPV1_12309 | OR13G1  | 6.738702                   | siganl < background (6.96) | Only in COC     |
| EMPV1_41683 | OR52E4  | 6.782903                   | siganl < background (6.96) | Only in COC     |
| EMPV1_23463 | OR2G3   | 7.89026                    | siganl < background (6.96) | Only in COC     |
| EMPV1_42353 | OR9I1   | siganl < background (6.69) | 6.962221                   | Only in embryos |
| EMPV1_33931 | OR10Q1  | siganl < background (6.69) | 6.964814                   | Only in embryos |
| EMPV1_23493 | OR7D4   | siganl < background (6.69) | 6.969238                   | Only in embryos |
| EMPV1_33294 | OR1D5   | siganl < background (6.69) | 6.971211                   | Only in embryos |

|             |        |                            |          |                 |
|-------------|--------|----------------------------|----------|-----------------|
| EMPV1_15392 | OR8B3  | siganl < background (6.69) | 6.971532 | Only in embryos |
| EMPV1_20675 | OR12D2 | siganl < background (6.69) | 6.972082 | Only in embryos |
| EMPV1_25738 | OR4X1  | siganl < background (6.69) | 6.973453 | Only in embryos |
| EMPV1_24867 | OR2B6  | siganl < background (6.69) | 6.974047 | Only in embryos |
| EMPV1_14148 | OR7E24 | siganl < background (6.69) | 6.974275 | Only in embryos |
| EMPV1_16896 | OR1M1  | siganl < background (6.69) | 6.975642 | Only in embryos |
| EMPV1_28248 | OR7E24 | siganl < background (6.69) | 6.97837  | Only in embryos |
| EMPV1_03824 | OR7D4  | siganl < background (6.69) | 6.978506 | Only in embryos |
| EMPV1_16939 | OR52B6 | siganl < background (6.69) | 6.978914 | Only in embryos |
| EMPV1_36043 | OR4F6  | siganl < background (6.69) | 6.979095 | Only in embryos |
| EMPV1_22303 | OR8H1  | siganl < background (6.69) | 6.981087 | Only in embryos |
| EMPV1_11579 | OR6M1  | siganl < background (6.69) | 6.982171 | Only in embryos |
| EMPV1_35105 | OR4C11 | siganl < background (6.69) | 6.984603 | Only in embryos |
| EMPV1_43303 | OR1L8  | siganl < background (6.69) | 6.985143 | Only in embryos |
| EMPV1_09044 | OR9G1  | siganl < background (6.69) | 6.985547 | Only in embryos |
| EMPV1_19676 | OR10A7 | siganl < background (6.69) | 6.985951 | Only in embryos |
| EMPV1_08813 | OR4K15 | siganl < background (6.69) | 6.985951 | Only in embryos |
| EMPV1_09274 | OR52H1 | siganl < background (6.69) | 6.985951 | Only in embryos |
| EMPV1_32659 | OR6C2  | siganl < background (6.69) | 6.987028 | Only in embryos |
| EMPV1_42290 | OR7A10 | siganl < background (6.69) | 6.987387 | Only in embryos |
| EMPV1_36419 | OR2Y1  | siganl < background (6.69) | 6.987387 | Only in embryos |
| EMPV1_27057 | OR8B12 | siganl < background (6.69) | 6.987476 | Only in embryos |
| EMPV1_11353 | OR52N4 | siganl < background (6.69) | 6.99007  | Only in embryos |
| EMPV1_06890 | OR2T6  | siganl < background (6.69) | 6.990516 | Only in embryos |
| EMPV1_11766 | OR8B3  | siganl < background (6.69) | 6.990561 | Only in embryos |
| EMPV1_34904 | OR4C46 | siganl < background (6.69) | 6.991497 | Only in embryos |
| EMPV1_09341 | OR51T1 | siganl < background (6.69) | 6.992654 | Only in embryos |
| EMPV1_22751 | OR6B1  | siganl < background (6.69) | 6.993454 | Only in embryos |
| EMPV1_42207 | OR4M1  | siganl < background (6.69) | 6.995584 | Only in embryos |
| EMPV1_09543 | OR12D2 | siganl < background (6.69) | 6.99859  | Only in embryos |
| EMPV1_03145 | OR7D4  | siganl < background (6.69) | 6.999427 | Only in embryos |
| EMPV1_15661 | OR2G2  | siganl < background (6.69) | 6.999692 | Only in embryos |
| EMPV1_17850 | OR1S1  | siganl < background (6.69) | 6.999824 | Only in embryos |
| EMPV1_08808 | OR6C3  | siganl < background (6.69) | 7.000264 | Only in embryos |

|             |         |                            |          |                 |
|-------------|---------|----------------------------|----------|-----------------|
| EMPV1_14397 | OR2L8   | siganl < background (6.69) | 7.001408 | Only in embryos |
| EMPV1_11850 | OR12D2  | siganl < background (6.69) | 7.001671 | Only in embryos |
| EMPV1_33159 | OR7A17  | siganl < background (6.69) | 7.00347  | Only in embryos |
| EMPV1_00446 | OR11A1  | siganl < background (6.69) | 7.005089 | Only in embryos |
| EMPV1_39215 | OR2G2   | siganl < background (6.69) | 7.0064   | Only in embryos |
| EMPV1_38892 | OR1D2   | siganl < background (6.69) | 7.007708 | Only in embryos |
| EMPV1_27438 | OR10H4  | siganl < background (6.69) | 7.008796 | Only in embryos |
| EMPV1_04342 | OR2B6   | siganl < background (6.69) | 7.011747 | Only in embryos |
| EMPV1_29091 | OR2AG1  | siganl < background (6.69) | 7.012786 | Only in embryos |
| EMPV1_26510 | OR4F21  | siganl < background (6.69) | 7.014644 | Only in embryos |
| EMPV1_03284 | OR2A7   | siganl < background (6.69) | 7.015118 | Only in embryos |
| EMPV1_32197 | OR11H12 | siganl < background (6.69) | 7.015506 | Only in embryos |
| EMPV1_30618 | OR13C2  | siganl < background (6.69) | 7.016625 | Only in embryos |
| EMPV1_07276 | OR2D3   | siganl < background (6.69) | 7.017657 | Only in embryos |
| EMPV1_02653 | OR13F1  | siganl < background (6.69) | 7.023732 | Only in embryos |
| EMPV1_03959 | OR4K1   | siganl < background (6.69) | 7.024073 | Only in embryos |
| EMPV1_34897 | OR4A47  | siganl < background (6.69) | 7.024669 | Only in embryos |
| EMPV1_21374 | OR10D4P | siganl < background (6.69) | 7.024839 | Only in embryos |
| EMPV1_35331 | OR8K3   | siganl < background (6.69) | 7.025902 | Only in embryos |
| EMPV1_28128 | OR2S2   | siganl < background (6.69) | 7.028065 | Only in embryos |
| EMPV1_19151 | OR6C76  | siganl < background (6.69) | 7.029418 | Only in embryos |
| EMPV1_33109 | OR10S1  | siganl < background (6.69) | 7.029418 | Only in embryos |
| EMPV1_00119 | OR51I1  | siganl < background (6.69) | 7.030601 | Only in embryos |
| EMPV1_23891 | OR2T34  | siganl < background (6.69) | 7.030854 | Only in embryos |
| EMPV1_01513 | OR5R1   | siganl < background (6.69) | 7.030854 | Only in embryos |
| EMPV1_18781 | OR2T3   | siganl < background (6.69) | 7.032372 | Only in embryos |
| EMPV1_37035 | OR52B4  | siganl < background (6.69) | 7.032372 | Only in embryos |
| EMPV1_23024 | OR52N4  | siganl < background (6.69) | 7.038784 | Only in embryos |
| EMPV1_08300 | OR5V1   | siganl < background (6.69) | 7.040284 | Only in embryos |
| EMPV1_01247 | OR51I1  | siganl < background (6.69) | 7.040284 | Only in embryos |
| EMPV1_16997 | OR8J3   | siganl < background (6.69) | 7.040534 | Only in embryos |
| EMPV1_36615 | OR4K17  | siganl < background (6.69) | 7.040534 | Only in embryos |
| EMPV1_17588 | OR13C2  | siganl < background (6.69) | 7.041158 | Only in embryos |
| EMPV1_01889 | OR12D3  | siganl < background (6.69) | 7.042072 | Only in embryos |

|             |         |                            |          |                 |
|-------------|---------|----------------------------|----------|-----------------|
| EMPV1_12794 | OR51L1  | siganl < background (6.69) | 7.042736 | Only in embryos |
| EMPV1_09211 | OR5AN1  | siganl < background (6.69) | 7.045056 | Only in embryos |
| EMPV1_15744 | OR1J4   | siganl < background (6.69) | 7.045139 | Only in embryos |
| EMPV1_19603 | OR8U9   | siganl < background (6.69) | 7.045139 | Only in embryos |
| EMPV1_18294 | OR52A5  | siganl < background (6.69) | 7.045139 | Only in embryos |
| EMPV1_15066 | OR5B21  | siganl < background (6.69) | 7.046379 | Only in embryos |
| EMPV1_38199 | OR8S1   | siganl < background (6.69) | 7.047122 | Only in embryos |
| EMPV1_25266 | OR4C46  | siganl < background (6.69) | 7.047534 | Only in embryos |
| EMPV1_38624 | OR5L1   | siganl < background (6.69) | 7.047945 | Only in embryos |
| EMPV1_40825 | OR6C4   | siganl < background (6.69) | 7.047945 | Only in embryos |
| EMPV1_41672 | OR10AD1 | siganl < background (6.69) | 7.048481 | Only in embryos |
| EMPV1_36890 | OR51E2  | siganl < background (6.69) | 7.04951  | Only in embryos |
| EMPV1_29390 | OR51F2  | siganl < background (6.69) | 7.049592 | Only in embryos |
| EMPV1_19259 | OR5B2   | siganl < background (6.69) | 7.050578 | Only in embryos |
| EMPV1_27930 | OR1L8   | siganl < background (6.69) | 7.050988 | Only in embryos |
| EMPV1_00364 | OR4K15  | siganl < background (6.69) | 7.05148  | Only in embryos |
| EMPV1_34126 | OR51F2  | siganl < background (6.69) | 7.051644 | Only in embryos |
| EMPV1_37895 | OR8B8   | siganl < background (6.69) | 7.052791 | Only in embryos |
| EMPV1_23090 | OR6C6   | siganl < background (6.69) | 7.055568 | Only in embryos |
| EMPV1_11601 | OR12D3  | siganl < background (6.69) | 7.055731 | Only in embryos |
| EMPV1_11153 | OR51V1  | siganl < background (6.69) | 7.056383 | Only in embryos |
| EMPV1_43639 | OR4K14  | siganl < background (6.69) | 7.056586 | Only in embryos |
| EMPV1_10142 | OR2S2   | siganl < background (6.69) | 7.057684 | Only in embryos |
| EMPV1_19129 | OR9Q1   | siganl < background (6.69) | 7.058172 | Only in embryos |
| EMPV1_01322 | OR4F16  | siganl < background (6.69) | 7.058172 | Only in embryos |
| EMPV1_17547 | OR8S1   | siganl < background (6.69) | 7.059146 | Only in embryos |
| EMPV1_08818 | OR51B2  | siganl < background (6.69) | 7.060565 | Only in embryos |
| EMPV1_08463 | OR14I1  | siganl < background (6.69) | 7.06198  | Only in embryos |
| EMPV1_10571 | OR56A3  | siganl < background (6.69) | 7.062222 | Only in embryos |
| EMPV1_21178 | OR4K14  | siganl < background (6.69) | 7.064601 | Only in embryos |
| EMPV1_36250 | OR1A1   | siganl < background (6.69) | 7.067855 | Only in embryos |
| EMPV1_36395 | OR7A17  | siganl < background (6.69) | 7.068336 | Only in embryos |
| EMPV1_21130 | OR5A2   | siganl < background (6.69) | 7.069456 | Only in embryos |
| EMPV1_42346 | OR1L8   | siganl < background (6.69) | 7.071213 | Only in embryos |

|             |         |                            |          |                 |
|-------------|---------|----------------------------|----------|-----------------|
| EMPV1_16229 | OR4C6   | siganl < background (6.69) | 7.071692 | Only in embryos |
| EMPV1_35544 | OR13C9  | siganl < background (6.69) | 7.072966 | Only in embryos |
| EMPV1_30589 | OR1M1   | siganl < background (6.69) | 7.072966 | Only in embryos |
| EMPV1_16682 | OR1J4   | siganl < background (6.69) | 7.073404 | Only in embryos |
| EMPV1_10041 | OR2G6   | siganl < background (6.69) | 7.073841 | Only in embryos |
| EMPV1_23660 | OR6C3   | siganl < background (6.69) | 7.074437 | Only in embryos |
| EMPV1_27349 | OR4F6   | siganl < background (6.69) | 7.074636 | Only in embryos |
| EMPV1_40426 | OR10X1  | siganl < background (6.69) | 7.075984 | Only in embryos |
| EMPV1_07771 | OR2T8   | siganl < background (6.69) | 7.077883 | Only in embryos |
| EMPV1_14605 | OR12D2  | siganl < background (6.69) | 7.080369 | Only in embryos |
| EMPV1_14154 | OR8A1   | siganl < background (6.69) | 7.080369 | Only in embryos |
| EMPV1_26661 | OR2C3   | siganl < background (6.69) | 7.083709 | Only in embryos |
| EMPV1_35824 | OR4F4   | siganl < background (6.69) | 7.084962 | Only in embryos |
| EMPV1_00482 | OR52M1  | siganl < background (6.69) | 7.085432 | Only in embryos |
| EMPV1_02144 | OR3A3   | siganl < background (6.69) | 7.086839 | Only in embryos |
| EMPV1_18534 | OR10G3  | siganl < background (6.69) | 7.087073 | Only in embryos |
| EMPV1_01009 | OR52A1  | siganl < background (6.69) | 7.089954 | Only in embryos |
| EMPV1_22542 | OR8J3   | siganl < background (6.69) | 7.093019 | Only in embryos |
| EMPV1_05101 | OR5AZ1P | siganl < background (6.69) | 7.09553  | Only in embryos |
| EMPV1_38016 | OR7A17  | siganl < background (6.69) | 7.095954 | Only in embryos |
| EMPV1_14930 | OR1D2   | siganl < background (6.69) | 7.097648 | Only in embryos |
| EMPV1_35289 | OR7G1   | siganl < background (6.69) | 7.098916 | Only in embryos |
| EMPV1_38553 | OR4K13  | siganl < background (6.69) | 7.099606 | Only in embryos |
| EMPV1_17417 | OR11H4  | siganl < background (6.69) | 7.099913 | Only in embryos |
| EMPV1_22092 | OR6C1   | siganl < background (6.69) | 7.106134 | Only in embryos |
| EMPV1_07401 | OR7A10  | siganl < background (6.69) | 7.107311 | Only in embryos |
| EMPV1_15578 | OR8B3   | siganl < background (6.69) | 7.108297 | Only in embryos |
| EMPV1_01991 | OR51V1  | siganl < background (6.69) | 7.112152 | Only in embryos |
| EMPV1_23584 | OR2C1   | siganl < background (6.69) | 7.112641 | Only in embryos |
| EMPV1_25305 | OR52K2  | siganl < background (6.69) | 7.115685 | Only in embryos |
| EMPV1_12509 | OR1J4   | siganl < background (6.69) | 7.120992 | Only in embryos |
| EMPV1_19750 | OR10X1  | siganl < background (6.69) | 7.120992 | Only in embryos |
| EMPV1_04764 | OR5R1   | siganl < background (6.69) | 7.121884 | Only in embryos |
| EMPV1_40727 | OR7G2   | siganl < background (6.69) | 7.123036 | Only in embryos |

|             |        |                            |          |                 |
|-------------|--------|----------------------------|----------|-----------------|
| EMPV1_27288 | OR5D18 | siganl < background (6.69) | 7.124631 | Only in embryos |
| EMPV1_27560 | OR5P3  | siganl < background (6.69) | 7.125149 | Only in embryos |
| EMPV1_33387 | OR4C46 | siganl < background (6.69) | 7.126    | Only in embryos |
| EMPV1_43632 | OR6C2  | siganl < background (6.69) | 7.127035 | Only in embryos |
| EMPV1_38268 | OR2G3  | siganl < background (6.69) | 7.136606 | Only in embryos |
| EMPV1_04711 | OR52A5 | siganl < background (6.69) | 7.136716 | Only in embryos |
| EMPV1_01146 | OR1A1  | siganl < background (6.69) | 7.136716 | Only in embryos |
| EMPV1_17101 | OR2T12 | siganl < background (6.69) | 7.13748  | Only in embryos |
| EMPV1_08683 | OR6C2  | siganl < background (6.69) | 7.141254 | Only in embryos |
| EMPV1_07966 | OR7D4  | siganl < background (6.69) | 7.141544 | Only in embryos |
| EMPV1_01378 | OR8D1  | siganl < background (6.69) | 7.141942 | Only in embryos |
| EMPV1_00983 | OR4K14 | siganl < background (6.69) | 7.148315 | Only in embryos |
| EMPV1_17775 | OR10R2 | siganl < background (6.69) | 7.151034 | Only in embryos |
| EMPV1_43662 | OR7E24 | siganl < background (6.69) | 7.151998 | Only in embryos |
| EMPV1_21360 | OR2F1  | siganl < background (6.69) | 7.153672 | Only in embryos |
| EMPV1_29445 | OR2AE1 | siganl < background (6.69) | 7.154276 | Only in embryos |
| EMPV1_32175 | OR6C1  | siganl < background (6.69) | 7.157575 | Only in embryos |
| EMPV1_01381 | OR52H1 | siganl < background (6.69) | 7.158777 | Only in embryos |
| EMPV1_14533 | OR5AN1 | siganl < background (6.69) | 7.158989 | Only in embryos |
| EMPV1_08562 | OR51I2 | siganl < background (6.69) | 7.160012 | Only in embryos |
| EMPV1_22291 | OR5D14 | siganl < background (6.69) | 7.160788 | Only in embryos |
| EMPV1_21633 | OR2T2  | siganl < background (6.69) | 7.161527 | Only in embryos |
| EMPV1_08413 | OR5M3  | siganl < background (6.69) | 7.162372 | Only in embryos |
| EMPV1_26724 | OR10J5 | siganl < background (6.69) | 7.162793 | Only in embryos |
| EMPV1_38140 | OR51I2 | siganl < background (6.69) | 7.162793 | Only in embryos |
| EMPV1_05746 | OR52K1 | siganl < background (6.69) | 7.165458 | Only in embryos |
| EMPV1_28403 | OR6C1  | siganl < background (6.69) | 7.166787 | Only in embryos |
| EMPV1_14604 | OR6C74 | siganl < background (6.69) | 7.166927 | Only in embryos |
| EMPV1_38581 | OR2B2  | siganl < background (6.69) | 7.166927 | Only in embryos |
| EMPV1_39989 | OR7C2  | siganl < background (6.69) | 7.170412 | Only in embryos |
| EMPV1_34902 | OR8U8  | siganl < background (6.69) | 7.173672 | Only in embryos |
| EMPV1_39904 | OR5AN1 | siganl < background (6.69) | 7.175918 | Only in embryos |
| EMPV1_04049 | OR2S2  | siganl < background (6.69) | 7.180595 | Only in embryos |
| EMPV1_17923 | OR9K2  | siganl < background (6.69) | 7.181794 | Only in embryos |

|             |        |                            |          |                 |
|-------------|--------|----------------------------|----------|-----------------|
| EMPV1_01834 | OR2T2  | siganl < background (6.69) | 7.182136 | Only in embryos |
| EMPV1_40590 | OR5R1  | siganl < background (6.69) | 7.182888 | Only in embryos |
| EMPV1_37105 | OR11G2 | siganl < background (6.69) | 7.183229 | Only in embryos |
| EMPV1_33272 | OR1N2  | siganl < background (6.69) | 7.184799 | Only in embryos |
| EMPV1_23444 | OR6K3  | siganl < background (6.69) | 7.185037 | Only in embryos |
| EMPV1_38128 | OR4F15 | siganl < background (6.69) | 7.185105 | Only in embryos |
| EMPV1_11283 | OR11H1 | siganl < background (6.69) | 7.187757 | Only in embryos |
| EMPV1_17537 | OR4F15 | siganl < background (6.69) | 7.188605 | Only in embryos |
| EMPV1_20134 | OR7E24 | siganl < background (6.69) | 7.188775 | Only in embryos |
| EMPV1_41163 | OR11G2 | siganl < background (6.69) | 7.191211 | Only in embryos |
| EMPV1_41195 | OR12D2 | siganl < background (6.69) | 7.192122 | Only in embryos |
| EMPV1_00545 | OR4F16 | siganl < background (6.69) | 7.192729 | Only in embryos |
| EMPV1_28045 | OR7A10 | siganl < background (6.69) | 7.194345 | Only in embryos |
| EMPV1_15819 | OR6C75 | siganl < background (6.69) | 7.194412 | Only in embryos |
| EMPV1_35382 | OR5AN1 | siganl < background (6.69) | 7.195219 | Only in embryos |
| EMPV1_39294 | OR52A1 | siganl < background (6.69) | 7.20134  | Only in embryos |
| EMPV1_18407 | OR2AE1 | siganl < background (6.69) | 7.203103 | Only in embryos |
| EMPV1_27708 | OR2B6  | siganl < background (6.69) | 7.203866 | Only in embryos |
| EMPV1_18581 | OR2L8  | siganl < background (6.69) | 7.205358 | Only in embryos |
| EMPV1_32201 | OR10G3 | siganl < background (6.69) | 7.210112 | Only in embryos |
| EMPV1_09222 | OR52R1 | siganl < background (6.69) | 7.21146  | Only in embryos |
| EMPV1_05911 | OR51G2 | siganl < background (6.69) | 7.211657 | Only in embryos |
| EMPV1_32651 | OR10X1 | siganl < background (6.69) | 7.217281 | Only in embryos |
| EMPV1_32340 | OR6C68 | siganl < background (6.69) | 7.220759 | Only in embryos |
| EMPV1_42733 | OR4F6  | siganl < background (6.69) | 7.22853  | Only in embryos |
| EMPV1_21993 | OR5AC2 | siganl < background (6.69) | 7.229011 | Only in embryos |
| EMPV1_04765 | OR8J3  | siganl < background (6.69) | 7.232209 | Only in embryos |
| EMPV1_04236 | OR4M1  | siganl < background (6.69) | 7.233038 | Only in embryos |
| EMPV1_30615 | OR4C46 | siganl < background (6.69) | 7.23393  | Only in embryos |
| EMPV1_29836 | OR5V1  | siganl < background (6.69) | 7.234567 | Only in embryos |
| EMPV1_06613 | OR10G7 | siganl < background (6.69) | 7.234948 | Only in embryos |
| EMPV1_09698 | OR51Q1 | siganl < background (6.69) | 7.234948 | Only in embryos |
| EMPV1_30578 | OR2A5  | siganl < background (6.69) | 7.235202 | Only in embryos |
| EMPV1_15920 | OR5B12 | siganl < background (6.69) | 7.239417 | Only in embryos |



|             |        |                            |          |                 |
|-------------|--------|----------------------------|----------|-----------------|
| EMPV1_17631 | OR4C46 | siganl < background (6.69) | 7.241404 | Only in embryos |
| EMPV1_33939 | OR56A3 | siganl < background (6.69) | 7.244987 | Only in embryos |
| EMPV1_25558 | OR4P4  | siganl < background (6.69) | 7.245926 | Only in embryos |
| EMPV1_27922 | OR4K1  | siganl < background (6.69) | 7.247334 | Only in embryos |
| EMPV1_11535 | OR52B6 | siganl < background (6.69) | 7.248271 | Only in embryos |
| EMPV1_24241 | OR11H6 | siganl < background (6.69) | 7.250515 | Only in embryos |
| EMPV1_01003 | OR5AN1 | siganl < background (6.69) | 7.251851 | Only in embryos |
| EMPV1_32264 | OR11G2 | siganl < background (6.69) | 7.251913 | Only in embryos |
| EMPV1_24531 | OR6C68 | siganl < background (6.69) | 7.252192 | Only in embryos |
| EMPV1_19884 | OR1J4  | siganl < background (6.69) | 7.256124 | Only in embryos |
| EMPV1_34875 | OR8B2  | siganl < background (6.69) | 7.25785  | Only in embryos |
| EMPV1_07026 | OR5AC2 | siganl < background (6.69) | 7.258619 | Only in embryos |
| EMPV1_38426 | OR4C13 | siganl < background (6.69) | 7.260033 | Only in embryos |
| EMPV1_10274 | OR5AR1 | siganl < background (6.69) | 7.260033 | Only in embryos |
| EMPV1_30131 | OR52B2 | siganl < background (6.69) | 7.265203 | Only in embryos |
| EMPV1_08784 | OR13C8 | siganl < background (6.69) | 7.265325 | Only in embryos |
| EMPV1_32966 | OR1L4  | siganl < background (6.69) | 7.271304 | Only in embryos |
| EMPV1_13877 | OR7A17 | siganl < background (6.69) | 7.272724 | Only in embryos |
| EMPV1_35600 | OR9K2  | siganl < background (6.69) | 7.273568 | Only in embryos |
| EMPV1_34920 | OR4K14 | siganl < background (6.69) | 7.273568 | Only in embryos |
| EMPV1_09840 | OR5AN1 | siganl < background (6.69) | 7.276515 | Only in embryos |
| EMPV1_24766 | OR56A4 | siganl < background (6.69) | 7.281121 | Only in embryos |
| EMPV1_04615 | OR52L1 | siganl < background (6.69) | 7.282908 | Only in embryos |
| EMPV1_17449 | OR6B3  | siganl < background (6.69) | 7.284957 | Only in embryos |
| EMPV1_03097 | OR4S1  | siganl < background (6.69) | 7.287179 | Only in embryos |
| EMPV1_33766 | OR9K2  | siganl < background (6.69) | 7.289569 | Only in embryos |
| EMPV1_29228 | OR2S2  | siganl < background (6.69) | 7.289658 | Only in embryos |
| EMPV1_34764 | OR7D4  | siganl < background (6.69) | 7.293918 | Only in embryos |
| EMPV1_36671 | OR6C75 | siganl < background (6.69) | 7.29617  | Only in embryos |
| EMPV1_24454 | OR56A4 | siganl < background (6.69) | 7.296345 | Only in embryos |
| EMPV1_04940 | OR13D1 | siganl < background (6.69) | 7.301378 | Only in embryos |
| EMPV1_16974 | OR1J1  | siganl < background (6.69) | 7.301842 | Only in embryos |
| EMPV1_27135 | OR8K5  | siganl < background (6.69) | 7.301842 | Only in embryos |
| EMPV1_08334 | OR52D1 | siganl < background (6.69) | 7.301871 | Only in embryos |

|             |        |                            |          |                 |
|-------------|--------|----------------------------|----------|-----------------|
| EMPV1_14677 | OR2Y1  | siganl < background (6.69) | 7.303087 | Only in embryos |
| EMPV1_28939 | OR2T12 | siganl < background (6.69) | 7.305916 | Only in embryos |
| EMPV1_32670 | OR5K2  | siganl < background (6.69) | 7.307413 | Only in embryos |
| EMPV1_38964 | OR1J4  | siganl < background (6.69) | 7.308159 | Only in embryos |
| EMPV1_43261 | OR10H1 | siganl < background (6.69) | 7.309422 | Only in embryos |
| EMPV1_00709 | OR4F6  | siganl < background (6.69) | 7.313311 | Only in embryos |
| EMPV1_05363 | OR1J1  | siganl < background (6.69) | 7.314764 | Only in embryos |
| EMPV1_01243 | OR7A10 | siganl < background (6.69) | 7.322154 | Only in embryos |
| EMPV1_35045 | OR2G6  | siganl < background (6.69) | 7.324628 | Only in embryos |
| EMPV1_12337 | OR56A3 | siganl < background (6.69) | 7.327122 | Only in embryos |
| EMPV1_15391 | OR6C65 | siganl < background (6.69) | 7.328659 | Only in embryos |
| EMPV1_23649 | OR5L1  | siganl < background (6.69) | 7.33114  | Only in embryos |
| EMPV1_39923 | OR52H1 | siganl < background (6.69) | 7.331501 | Only in embryos |
| EMPV1_07439 | OR9I1  | siganl < background (6.69) | 7.334221 | Only in embryos |
| EMPV1_24245 | OR4C3  | siganl < background (6.69) | 7.340592 | Only in embryos |
| EMPV1_30480 | OR10A3 | siganl < background (6.69) | 7.344125 | Only in embryos |
| EMPV1_32885 | OR56B4 | siganl < background (6.69) | 7.347859 | Only in embryos |
| EMPV1_21698 | OR52D1 | siganl < background (6.69) | 7.351303 | Only in embryos |
| EMPV1_09561 | OR5L1  | siganl < background (6.69) | 7.351357 | Only in embryos |
| EMPV1_04781 | OR51G1 | siganl < background (6.69) | 7.35368  | Only in embryos |
| EMPV1_01927 | OR4X2  | siganl < background (6.69) | 7.35465  | Only in embryos |
| EMPV1_07250 | OR2Y1  | siganl < background (6.69) | 7.35723  | Only in embryos |
| EMPV1_24292 | OR4C6  | siganl < background (6.69) | 7.35841  | Only in embryos |
| EMPV1_00251 | OR7A10 | siganl < background (6.69) | 7.360309 | Only in embryos |
| EMPV1_16604 | OR10H2 | siganl < background (6.69) | 7.361697 | Only in embryos |
| EMPV1_30590 | OR7A10 | siganl < background (6.69) | 7.36215  | Only in embryos |
| EMPV1_24548 | OR1J4  | siganl < background (6.69) | 7.366931 | Only in embryos |
| EMPV1_29603 | OR4L1  | siganl < background (6.69) | 7.367434 | Only in embryos |
| EMPV1_41572 | OR10X1 | siganl < background (6.69) | 7.378174 | Only in embryos |
| EMPV1_20076 | OR5R1  | siganl < background (6.69) | 7.384531 | Only in embryos |
| EMPV1_29362 | OR8B3  | siganl < background (6.69) | 7.384996 | Only in embryos |
| EMPV1_06963 | OR14I1 | siganl < background (6.69) | 7.387445 | Only in embryos |
| EMPV1_13552 | OR4P4  | siganl < background (6.69) | 7.387856 | Only in embryos |
| EMPV1_02061 | OR51F1 | siganl < background (6.69) | 7.389706 | Only in embryos |

|             |         |                            |          |                 |
|-------------|---------|----------------------------|----------|-----------------|
| EMPV1_35922 | OR5A2   | siganl < background (6.69) | 7.392931 | Only in embryos |
| EMPV1_15905 | OR6C70  | siganl < background (6.69) | 7.395531 | Only in embryos |
| EMPV1_34151 | OR4L1   | siganl < background (6.69) | 7.397309 | Only in embryos |
| EMPV1_09069 | OR5R1   | siganl < background (6.69) | 7.399565 | Only in embryos |
| EMPV1_28186 | OR6C68  | siganl < background (6.69) | 7.40098  | Only in embryos |
| EMPV1_10680 | OR9G1   | siganl < background (6.69) | 7.404432 | Only in embryos |
| EMPV1_41904 | OR4C46  | siganl < background (6.69) | 7.404633 | Only in embryos |
| EMPV1_33344 | OR9I1   | siganl < background (6.69) | 7.404633 | Only in embryos |
| EMPV1_06256 | OR2H2   | siganl < background (6.69) | 7.405135 | Only in embryos |
| EMPV1_40734 | OR8B4   | siganl < background (6.69) | 7.407191 | Only in embryos |
| EMPV1_10903 | OR4L1   | siganl < background (6.69) | 7.408417 | Only in embryos |
| EMPV1_26961 | OR4F4   | siganl < background (6.69) | 7.412976 | Only in embryos |
| EMPV1_04162 | OR7D4   | siganl < background (6.69) | 7.43972  | Only in embryos |
| EMPV1_33737 | OR2M3   | siganl < background (6.69) | 7.440055 | Only in embryos |
| EMPV1_39328 | OR2M3   | siganl < background (6.69) | 7.441131 | Only in embryos |
| EMPV1_35499 | OR52D1  | siganl < background (6.69) | 7.442252 | Only in embryos |
| EMPV1_42182 | OR8B8   | siganl < background (6.69) | 7.443634 | Only in embryos |
| EMPV1_21420 | OR1N2   | siganl < background (6.69) | 7.444728 | Only in embryos |
| EMPV1_33085 | OR1J4   | siganl < background (6.69) | 7.464907 | Only in embryos |
| EMPV1_26450 | OR14C36 | siganl < background (6.69) | 7.468825 | Only in embryos |
| EMPV1_10700 | OR4C46  | siganl < background (6.69) | 7.472722 | Only in embryos |
| EMPV1_19537 | OR2M3   | siganl < background (6.69) | 7.47728  | Only in embryos |
| EMPV1_23013 | OR2A2   | siganl < background (6.69) | 7.484199 | Only in embryos |
| EMPV1_34130 | OR4E2   | siganl < background (6.69) | 7.487476 | Only in embryos |
| EMPV1_02494 | OR4K2   | siganl < background (6.69) | 7.488819 | Only in embryos |
| EMPV1_35303 | OR10G2  | siganl < background (6.69) | 7.488863 | Only in embryos |
| EMPV1_23851 | OR2M3   | siganl < background (6.69) | 7.49036  | Only in embryos |
| EMPV1_35721 | OR6C2   | siganl < background (6.69) | 7.495451 | Only in embryos |
| EMPV1_12873 | OR52K2  | siganl < background (6.69) | 7.505089 | Only in embryos |
| EMPV1_34471 | OR6Q1   | siganl < background (6.69) | 7.509904 | Only in embryos |
| EMPV1_11805 | OR1J4   | siganl < background (6.69) | 7.513262 | Only in embryos |
| EMPV1_36620 | OR5M8   | siganl < background (6.69) | 7.514859 | Only in embryos |
| EMPV1_39145 | OR2M3   | siganl < background (6.69) | 7.518087 | Only in embryos |
| EMPV1_19746 | OR4F6   | siganl < background (6.69) | 7.519438 | Only in embryos |

|             |         |                            |          |                 |
|-------------|---------|----------------------------|----------|-----------------|
| EMPV1_10796 | OR2A20P | siganl < background (6.69) | 7.528213 | Only in embryos |
| EMPV1_00735 | OR2M3   | siganl < background (6.69) | 7.528319 | Only in embryos |
| EMPV1_20972 | OR4C46  | siganl < background (6.69) | 7.532813 | Only in embryos |
| EMPV1_35662 | OR8B4   | siganl < background (6.69) | 7.533381 | Only in embryos |
| EMPV1_15361 | OR1J4   | siganl < background (6.69) | 7.535899 | Only in embryos |
| EMPV1_00929 | OR1J2   | siganl < background (6.69) | 7.538825 | Only in embryos |
| EMPV1_03397 | OR4P4   | siganl < background (6.69) | 7.541158 | Only in embryos |
| EMPV1_23821 | OR4A47  | siganl < background (6.69) | 7.543711 | Only in embryos |
| EMPV1_11366 | OR10G4  | siganl < background (6.69) | 7.552668 | Only in embryos |
| EMPV1_30739 | OR4B1   | siganl < background (6.69) | 7.555812 | Only in embryos |
| EMPV1_38852 | OR8S1   | siganl < background (6.69) | 7.557258 | Only in embryos |
| EMPV1_20809 | OR8S1   | siganl < background (6.69) | 7.559146 | Only in embryos |
| EMPV1_04842 | OR4F21  | siganl < background (6.69) | 7.560605 | Only in embryos |
| EMPV1_04090 | OR4F21  | siganl < background (6.69) | 7.560807 | Only in embryos |
| EMPV1_05901 | OR7A10  | siganl < background (6.69) | 7.568235 | Only in embryos |
| EMPV1_28328 | OR11H6  | siganl < background (6.69) | 7.569715 | Only in embryos |
| EMPV1_32296 | OR5C1   | siganl < background (6.69) | 7.572011 | Only in embryos |
| EMPV1_08693 | OR52E6  | siganl < background (6.69) | 7.574715 | Only in embryos |
| EMPV1_01163 | OR6P1   | siganl < background (6.69) | 7.591507 | Only in embryos |
| EMPV1_14079 | OR1L8   | siganl < background (6.69) | 7.596147 | Only in embryos |
| EMPV1_35935 | OR52K2  | siganl < background (6.69) | 7.605906 | Only in embryos |
| EMPV1_24236 | OR5P3   | siganl < background (6.69) | 7.612679 | Only in embryos |
| EMPV1_27316 | OR51G2  | siganl < background (6.69) | 7.623036 | Only in embryos |
| EMPV1_14896 | OR4C6   | siganl < background (6.69) | 7.626702 | Only in embryos |
| EMPV1_06993 | OR2T29  | siganl < background (6.69) | 7.628989 | Only in embryos |
| EMPV1_04022 | OR1J2   | siganl < background (6.69) | 7.630643 | Only in embryos |
| EMPV1_13764 | OR2A2   | siganl < background (6.69) | 7.631011 | Only in embryos |
| EMPV1_13111 | OR1J1   | siganl < background (6.69) | 7.635075 | Only in embryos |
| EMPV1_20538 | OR8B4   | siganl < background (6.69) | 7.636606 | Only in embryos |
| EMPV1_02049 | OR11G2  | siganl < background (6.69) | 7.647149 | Only in embryos |
| EMPV1_29447 | OR2M2   | siganl < background (6.69) | 7.652461 | Only in embryos |
| EMPV1_22433 | OR7D4   | siganl < background (6.69) | 7.652603 | Only in embryos |
| EMPV1_13417 | OR10J3  | siganl < background (6.69) | 7.652853 | Only in embryos |
| EMPV1_25494 | OR8B2   | siganl < background (6.69) | 7.65296  | Only in embryos |

|             |        |                            |          |                 |
|-------------|--------|----------------------------|----------|-----------------|
| EMPV1_42825 | OR4K2  | siganl < background (6.69) | 7.660259 | Only in embryos |
| EMPV1_34949 | OR10J5 | siganl < background (6.69) | 7.669925 | Only in embryos |
| EMPV1_29226 | OR52E8 | siganl < background (6.69) | 7.683161 | Only in embryos |
| EMPV1_05451 | OR1E1  | siganl < background (6.69) | 7.695454 | Only in embryos |
| EMPV1_06701 | OR1J1  | siganl < background (6.69) | 7.702438 | Only in embryos |
| EMPV1_03887 | OR9I1  | siganl < background (6.69) | 7.709881 | Only in embryos |
| EMPV1_12669 | OR6M1  | siganl < background (6.69) | 7.714098 | Only in embryos |
| EMPV1_01029 | OR4L1  | siganl < background (6.69) | 7.716303 | Only in embryos |
| EMPV1_02658 | OR1J2  | siganl < background (6.69) | 7.725718 | Only in embryos |
| EMPV1_01841 | OR4B1  | siganl < background (6.69) | 7.72853  | Only in embryos |
| EMPV1_39727 | OR2AE1 | siganl < background (6.69) | 7.736789 | Only in embryos |
| EMPV1_16988 | OR4F16 | siganl < background (6.69) | 7.742254 | Only in embryos |
| EMPV1_28777 | OR4P4  | siganl < background (6.69) | 7.742317 | Only in embryos |
| EMPV1_02145 | OR4D10 | siganl < background (6.69) | 7.748723 | Only in embryos |
| EMPV1_32405 | OR14J1 | siganl < background (6.69) | 7.754331 | Only in embryos |
| EMPV1_29726 | OR4L1  | siganl < background (6.69) | 7.76782  | Only in embryos |
| EMPV1_39723 | OR4Q3  | siganl < background (6.69) | 7.778612 | Only in embryos |
| EMPV1_11764 | OR4S1  | siganl < background (6.69) | 7.781121 | Only in embryos |
| EMPV1_01430 | OR5P3  | siganl < background (6.69) | 7.792305 | Only in embryos |
| EMPV1_02570 | OR5P3  | siganl < background (6.69) | 7.796783 | Only in embryos |
| EMPV1_24902 | OR6M1  | siganl < background (6.69) | 7.834138 | Only in embryos |
| EMPV1_14571 | OR11H4 | siganl < background (6.69) | 7.839396 | Only in embryos |
| EMPV1_21898 | OR2T1  | siganl < background (6.69) | 7.84136  | Only in embryos |
| EMPV1_22796 | OR5R1  | siganl < background (6.69) | 7.842607 | Only in embryos |
| EMPV1_38368 | OR2M5  | siganl < background (6.69) | 7.844985 | Only in embryos |
| EMPV1_25298 | OR4K1  | siganl < background (6.69) | 7.845436 | Only in embryos |
| EMPV1_16833 | OR10G9 | siganl < background (6.69) | 7.848972 | Only in embryos |
| EMPV1_16802 | OR10G9 | siganl < background (6.69) | 7.853154 | Only in embryos |
| EMPV1_40489 | OR1J4  | siganl < background (6.69) | 7.85841  | Only in embryos |
| EMPV1_04481 | OR1J4  | siganl < background (6.69) | 7.878799 | Only in embryos |
| EMPV1_07357 | OR9I1  | siganl < background (6.69) | 7.893951 | Only in embryos |
| EMPV1_04703 | OR7A10 | siganl < background (6.69) | 7.894754 | Only in embryos |
| EMPV1_12053 | OR2M2  | siganl < background (6.69) | 7.896103 | Only in embryos |
| EMPV1_36293 | OR52H1 | siganl < background (6.69) | 7.899603 | Only in embryos |

|             |        |                            |          |                 |
|-------------|--------|----------------------------|----------|-----------------|
| EMPV1_03151 | OR6Y1  | siganl < background (6.69) | 7.907892 | Only in embryos |
| EMPV1_05222 | OR2H2  | siganl < background (6.69) | 7.922684 | Only in embryos |
| EMPV1_25088 | OR8K5  | siganl < background (6.69) | 7.930253 | Only in embryos |
| EMPV1_00892 | OR2M3  | siganl < background (6.69) | 7.935122 | Only in embryos |
| EMPV1_22987 | OR6Y1  | siganl < background (6.69) | 7.963055 | Only in embryos |
| EMPV1_06996 | OR7A10 | siganl < background (6.69) | 7.986826 | Only in embryos |
| EMPV1_41194 | OR6C74 | siganl < background (6.69) | 7.990605 | Only in embryos |
| EMPV1_43602 | OR52B6 | siganl < background (6.69) | 8.008056 | Only in embryos |
| EMPV1_16280 | OR11H4 | siganl < background (6.69) | 8.036181 | Only in embryos |
| EMPV1_18445 | OR1S2  | siganl < background (6.69) | 8.055975 | Only in embryos |
| EMPV1_12262 | OR9I1  | siganl < background (6.69) | 8.077765 | Only in embryos |
| EMPV1_22598 | OR10Z1 | siganl < background (6.69) | 8.092235 | Only in embryos |
| EMPV1_38117 | OR1A1  | siganl < background (6.69) | 8.156069 | Only in embryos |
| EMPV1_29471 | OR3A4  | siganl < background (6.69) | 8.175073 | Only in embryos |
| EMPV1_34215 | OR8S1  | siganl < background (6.69) | 8.193049 | Only in embryos |
| EMPV1_39340 | OR2Z1  | siganl < background (6.69) | 8.216939 | Only in embryos |
| EMPV1_20349 | OR1J4  | siganl < background (6.69) | 8.263853 | Only in embryos |
| EMPV1_22160 | OR2H1  | siganl < background (6.69) | 8.285892 | Only in embryos |
| EMPV1_03469 | OR4S1  | siganl < background (6.69) | 8.34707  | Only in embryos |
| EMPV1_38300 | OR4F21 | siganl < background (6.69) | 8.390257 | Only in embryos |
| EMPV1_06131 | OR1E1  | siganl < background (6.69) | 8.390532 | Only in embryos |
| EMPV1_19261 | OR4F21 | siganl < background (6.69) | 8.412411 | Only in embryos |
| EMPV1_37024 | OR52J3 | siganl < background (6.69) | 8.429719 | Only in embryos |
| EMPV1_37497 | OR6B3  | siganl < background (6.69) | 8.435983 | Only in embryos |
| EMPV1_43300 | OR4C3  | siganl < background (6.69) | 8.440832 | Only in embryos |
| EMPV1_19944 | OR5P3  | siganl < background (6.69) | 8.471738 | Only in embryos |
| EMPV1_27580 | OR51F2 | siganl < background (6.69) | 8.659642 | Only in embryos |
| EMPV1_31962 | OR7A10 | siganl < background (6.69) | 8.716475 | Only in embryos |
| EMPV1_09882 | OR7A10 | siganl < background (6.69) | 8.730296 | Only in embryos |
| EMPV1_24577 | OR2H1  | siganl < background (6.69) | 8.807517 | Only in embryos |
| EMPV1_19327 | OR52E2 | siganl < background (6.69) | 8.849997 | Only in embryos |
| EMPV1_13297 | OR4C16 | siganl < background (6.69) | 8.972602 | Only in embryos |
| EMPV1_15725 | OR4B1  | siganl < background (6.69) | 8.98446  | Only in embryos |
| EMPV1_16317 | OR4D2  | siganl < background (6.69) | 8.988673 | Only in embryos |

|             |         |                            |          |                 |
|-------------|---------|----------------------------|----------|-----------------|
| EMPV1_16660 | OR13H1  | siganl < background (6.69) | 9.041298 | Only in embryos |
| EMPV1_16651 | OR2AT4  | siganl < background (6.69) | 9.20863  | Only in embryos |
| EMPV1_30410 | OR4B1   | siganl < background (6.69) | 9.224223 | Only in embryos |
| EMPV1_32442 | OR56A1  | siganl < background (6.69) | 9.268016 | Only in embryos |
| EMPV1_37996 | OR8K5   | siganl < background (6.69) | 9.305166 | Only in embryos |
| EMPV1_36905 | OR2B11  | siganl < background (6.69) | 9.313439 | Only in embryos |
| EMPV1_07576 | OR1A1   | siganl < background (6.69) | 9.386384 | Only in embryos |
| EMPV1_10946 | OR4B1   | siganl < background (6.69) | 9.606487 | Only in embryos |
| EMPV1_37970 | OR4C3   | siganl < background (6.69) | 9.661186 | Only in embryos |
| EMPV1_17815 | OR4B1   | siganl < background (6.69) | 9.694068 | Only in embryos |
| EMPV1_36098 | OR1A1   | siganl < background (6.69) | 9.694929 | Only in embryos |
| EMPV1_34164 | OR8B4   | siganl < background (6.69) | 9.701685 | Only in embryos |
| EMPV1_08382 | OR4N2   | siganl < background (6.69) | 9.830342 | Only in embryos |
| EMPV1_41865 | OR7E37P | siganl < background (6.69) | 9.898475 | Only in embryos |
| EMPV1_37565 | OR4C16  | siganl < background (6.69) | 10.91687 | Only in embryos |
| EMPV1_06511 | OR4C16  | siganl < background (6.69) | 11.14043 | Only in embryos |
